# Supplementary material for: Smartphone Addiction and Related Factors among Athletes
Source: MDPI journal article supplement (doi:10.3390/bs14040341), 2024-04-18
Supplement: s1 [file s1]

### Supplementary Table S1

#### *Number of Athletes in Handball Teams*

| Name of Sports Club           | Professional Women's Team<br>(Number of Athletes) | Professional Men's Team<br>(Number of Athletes) | Licensed Women's Youth Teams<br>(Number of Athletes) (Youth) | Licensed Men's Youth Teams<br>(Number of Athletes) (Youth) |
|-------------------------------|---------------------------------------------------|-------------------------------------------------|--------------------------------------------------------------|------------------------------------------------------------|
| İzmir B.Ş.B.S.K.              | 16                                                | 16                                              | 12                                                           | 12                                                         |
| Göztepe S.K.                  | X                                                 | 16                                              | X                                                            | 12                                                         |
| İzmir G.H.S.İ.M. S.K.         | 16                                                | X                                               | 14                                                           | X                                                          |
| Bornova Bld. S.K.             | 16                                                | X                                               | 14                                                           | X                                                          |
| 1970 Vefa G.S.K.              | 14                                                | X                                               | X                                                            | X                                                          |
| Gaziemir Atletizm S.K.        | X                                                 | 12                                              | X                                                            | X                                                          |
| Dikili Günes S.K.             | X                                                 | 14                                              | X                                                            | X                                                          |
| Seferihisar Cözüm Koleji S.K. | X                                                 | 16                                              | X                                                            | X                                                          |
| A.T.S.K.                      | X                                                 | 12                                              | X                                                            | X                                                          |
| Total                         | 62                                                | 85                                              | 40                                                           | 24                                                         |
| 212                           |                                                   |                                                 |                                                              |                                                            |

### Supplementary Table S2

#### *Mean, SD, Deviation, etc. of Data Related to TFEQ and Body Perception*

| Data Group      | Variables                                    | N   | Minimum | Maximum | Mean  | Std. Deviation |
|-----------------|----------------------------------------------|-----|---------|---------|-------|----------------|
| Eating Status   | Number of Main Meals per Day                 | 202 | 1       | 5       | 2.58  | 0.70           |
|                 | Number of Snacks per Day                     | 202 | 0       | 6       | 1.86  | 1.07           |
|                 | TFEQ scale total score                       | 202 | 18      | 71      | 47.66 | 11.07          |
|                 | Inability to restrain eating                 | 202 | 5       | 20      | 13.15 | 3.69           |
|                 | Emotional Eating                             | 202 | 3       | 12      | 8.38  | 2.94           |
|                 | Conscious restriction of eating              | 202 | 6       | 23      | 14.51 | 3.81           |
|                 | Hunger                                       | 202 | 4       | 16      | 11.60 | 3.82           |
|                 | Appreciation of Own Body Structure (1-4)     | 202 | 1       | 4       | 2.26  | 0.68           |
| Body Perception | Media Interest in Ideal Body Structure (1-3) | 202 | 1       | 3       | 1.88  | 0.83           |
|                 | Body Perception Scale Score                  | 202 | 40      | 192     | 87.20 | 29.40          |
